# Supplementary material for: Combination of Trans-Resveratrol and ε-Viniferin Induces a Hepatoprotective Effect in Rats with Severe Acute Liver Failure via Reduction of Oxidative Stress and MMP-9 Expression
Source: MDPI journal article supplement (doi:10.3390/nu13113677), 2021-10-20
Supplement: s1 [file s1]

## Supporting Information

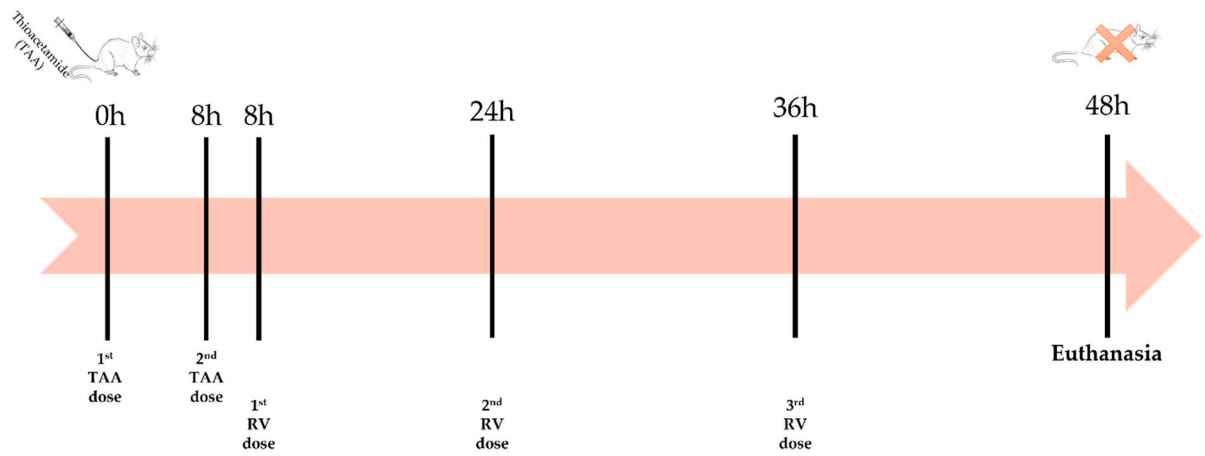

**Figure S1.** Study design.

**Table S1.** List of primers used for RT-qPCR

| Accession number<br>(NCBI) | ID attributed <sup>1</sup> | Primer sequence                | Product<br>length |
|----------------------------|----------------------------|--------------------------------|-------------------|
| NM_017232                  | RnCOX-2F                   | GAT TGA CAG CCC ACC AAC TT     | 149               |
|                            | RnCOX-2R                   | CGG GAT GAA CTC TCT CCT CA     |                   |
| XM_039085203               | RniNOSF                    | GGA GAG ATT TTT TCA CGA CAC CC | 74                |
|                            | RniNOSR                    | CCA TGC ATA ATT TGG ACT TGC A  |                   |
| XM_008772775               | RnNFkBf                    | GAA AGT AAG GAT GTG GGA GGA G  | 156               |
|                            | RnNFkBfR                   | GTG GAT GAT GGC TAA GTG TAG G  |                   |
| XM_008772775               | RnTNF $\alpha$ F           | ACT GAA CTT CGG GGT GAT TG     | 128               |
|                            | RnTNF $\alpha$ R           | GCT TGG TGG TTT GCTACG AC      |                   |
| NM_031055                  | RnMMP9F                    | GTA ACC CTG GTC ACC GGA CTT    | 117               |
|                            | RnMMP9R                    | ATA CGT TCC CGG CTG ATC AG     |                   |
| NM_012589                  | RnIL-6F                    | TGT ATG AAC AGC GAT GAT GCA C  | 116               |
|                            | RnIL-6R                    | ACG GAA CTC CAG AAG ACC AGA G  |                   |
| XM_00624971                | RnIL-10F                   | CTG CTA TGT TGC CTG CTC TTA    | 85                |
|                            | RnIL-10R                   | GGG AAG TGG GTG CAG TTA TT     |                   |
| NM_001394060               | RnGAPDHf                   | GTA TTG GGC GCC TGG TCA CC     | 185               |
|                            | RnGAPDHR                   | CGC TCC TGG AAG ATG GTG ATG G  |                   |
